# Supplementary material for: Performance of PCR/Electrospray Ionization-Mass Spectrometry on Whole Blood for Detection of Bloodstream Microorganisms in Patients with Suspected Sepsis
Source: PubMed Central journal article supplement (PMC7448645; doi:10.1128/jcm.01860-19), 2020-08-24
Supplement: JCM.01860-19-s0001.pdf [file JCM.01860-19-s0001.pdf]

**TABLE S1** Analytical limit of detection (LOD) of PCR/ESI-MS for different microorganisms based on spiked EDTA whole blood samples. The LODs were confirmed on 20 samples per microorganism, in which a detection rate of at least 95% (minimum of 19/20 valid replicates) was required for a confirmed LOD

| <b>Microorganism</b>                | <b>Confirmed LOD<br/>CFU/mL</b> |
|-------------------------------------|---------------------------------|
| <b>Gram-positive bacteria</b>       |                                 |
| <i>Bacillus cereus</i> complex      | 16                              |
| <i>Clostridium perfringens</i>      | 0.5                             |
| <i>Corynebacterium diphtheriae</i>  | 128                             |
| <i>Corynebacterium jeikeium</i>     | 16                              |
| <i>Enterococcus faecalis</i>        | 32                              |
| <i>Enterococcus faecium</i>         | 16                              |
| <i>Enterococcus gallinarum</i>      | 16                              |
| <i>Listeria monocytogenes</i>       | 128                             |
| <i>Micrococcus luteus</i>           | 2                               |
| <i>Nocardia farcinica</i>           | 64                              |
| <i>Cutibacterium acnes</i>          | 256                             |
| <i>Staphylococcus aureus</i>        | 32                              |
| <i>Staphylococcus caprae</i>        | 256                             |
| <i>Staphylococcus epidermidis</i>   | 256                             |
| <i>Staphylococcus haemolyticus</i>  | 128                             |
| <i>Staphylococcus hominis</i>       | 256                             |
| <i>Staphylococcus lugdunensis</i>   | 128                             |
| <i>Streptococcus agalactiae</i>     | 32                              |
| <i>Streptococcus mitis</i>          | 64                              |
| <i>Streptococcus pyogenes</i>       | 8                               |
| <b>Gram-negative bacteria</b>       |                                 |
| <i>Acinetobacter baumannii</i>      | 32                              |
| <i>Acinetobacter calcoaceticus</i>  | 128                             |
| <i>Acinetobacter lwoffii</i>        | 64                              |
| <i>Bacteroides fragilis</i>         | 256                             |
| <i>Bacteroides thetaiotaomicron</i> | 64                              |
| <i>Citrobacter freundii</i>         | 64                              |
| <i>Cronobacter sakazakii</i>        | 32                              |

|                                     |     |
|-------------------------------------|-----|
| <i>Enterobacter aerogenes</i>       | 4   |
| <i>Enterobacter cloacae complex</i> | 64  |
| <i>Escherichia coli</i>             | 8   |
| <i>Fusobacterium nucleatum</i>      | 8   |
| <i>Haemophilus influenzae</i>       | 32  |
| <i>Klebsiella oxytoca</i>           | 16  |
| <i>Klebsiella pneumoniae</i>        | 64  |
| <i>Moraxella catarrhalis</i>        | 64  |
| <i>Morganella morganii</i>          | 16  |
| <i>Neisseria meningitidis</i>       | 16  |
| <i>Proteus mirabilis</i>            | 16  |
| <i>Providencia stuartii</i>         | 64  |
| <i>Pseudomonas aeruginosa</i>       | 8   |
| <i>Pseudomonas fluorescens</i>      | 16  |
| <i>Salmonella enterica</i>          | 64  |
| <i>Serratia marcescens</i>          | 32  |
| <i>Stenotrophomonas maltophilia</i> | 4   |
| <b>Mycobacteria</b>                 |     |
| <i>Mycobacterium fortuitum</i>      | 256 |
| <b>Candida species</b>              |     |
| <i>Candida albicans</i>             | 8   |
| <i>Candida dubliniensis</i>         | 4   |
| <i>Candida glabrata</i>             | 16  |
| <i>Candida parapsilosis</i>         | 8   |
| <i>Candida tropicalis</i>           | 8   |
