# Supplementary material for: Performance of PCR/Electrospray Ionization-Mass Spectrometry on Whole Blood for Detection of Bloodstream Microorganisms in Patients with Suspected Sepsis
Source: PubMed Central journal article supplement (PMC7448645; doi:10.1128/jcm.01860-19), 2020-08-24
Supplement: JCM.01860-19-s0002.pdf [file JCM.01860-19-s0002.pdf]

**Table S2** Performance of PCR/ESI-MS on 2,500 positive contrived specimens

| Contrived organism                  | Organism present |             | Organism NOT present |             |
|-------------------------------------|------------------|-------------|----------------------|-------------|
|                                     | PCR/ESI-MS+      | PCR/ESI-MS- | PCR/ESI-MS+          | PCR/ESI-MS- |
| <i>Acinetobacter baumannii</i>      | 49               | 1           | 0                    | 2,450       |
| <i>Acinetobacter calcoaceticus</i>  | 50               | 0           | 1                    | 2,449       |
| <i>Acinetobacter lwoffii</i>        | 49               | 1           | 0                    | 2,450       |
| <i>Bacillus cereus</i> complex      | 50               | 0           | 0                    | 2,450       |
| <i>Bacteroides fragilis</i>         | 49               | 1           | 0                    | 2,450       |
| <i>Bacteroides thetaiotaomicron</i> | 50               | 0           | 0                    | 2,450       |
| <i>Candida albicans</i>             | 49               | 1           | 0                    | 2,450       |
| <i>Candida dubliniensis</i>         | 49               | 1           | 0                    | 2,450       |
| <i>Candida glabrata</i>             | 50               | 0           | 0                    | 2,450       |
| <i>Candida parapsilosis</i>         | 50               | 0           | 0                    | 2,450       |
| <i>Candida tropicalis</i>           | 50               | 0           | 2                    | 2,448       |
| <i>Citrobacter freundii</i>         | 49               | 1           | 0                    | 2,450       |
| <i>Clostridium perfringens</i>      | 50               | 0           | 0                    | 2,450       |
| <i>Corynebacterium diphtheriae</i>  | 50               | 0           | 0                    | 2,450       |
| <i>Corynebacterium jeikeium</i>     | 48               | 2           | 0                    | 2,450       |
| <i>Cronobacter sakazakii</i>        | 50               | 0           | 0                    | 2,450       |
| <i>Enterobacter aerogenes</i>       | 50               | 0           | 1                    | 2,449       |
| <i>Enterobacter cloacae</i> complex | 50               | 0           | 0                    | 2,450       |
| <i>Enterococcus faecalis</i>        | 50               | 0           | 0                    | 2,450       |
| <i>Enterococcus faecium</i>         | 49               | 1           | 0                    | 2,450       |
| <i>Enterococcus gallinarum</i>      | 50               | 0           | 0                    | 2,450       |
| <i>Escherichia coli</i>             | 49               | 1           | 3                    | 2,447       |
| <i>Fusobacterium nucleatum</i>      | 49               | 1           | 1                    | 2,449       |
| <i>Haemophilus influenzae</i>       | 48               | 2           | 0                    | 2,450       |
| <i>Klebsiella oxytoca</i>           | 50               | 0           | 0                    | 2,450       |
| <i>Klebsiella pneumoniae</i>        | 50               | 0           | 2                    | 2,448       |
| <i>Listeria monocytogenes</i>       | 49               | 1           | 0                    | 2,450       |
| <i>Micrococcus luteus</i>           | 49               | 1           | 2                    | 2,448       |
| <i>Moraxella catarrhalis</i>        | 50               | 0           | 0                    | 2,450       |
| <i>Morganella morganii</i>          | 49               | 1           | 0                    | 2,450       |
| <i>Mycobacterium fortuitum</i>      | 49               | 1           | 0                    | 2,450       |
| <i>Neisseria meningitidis</i>       | 49               | 1           | 1                    | 2,449       |

|                                     |    |   |   |       |
|-------------------------------------|----|---|---|-------|
| <i>Nocardia farcinica</i>           | 50 | 0 | 4 | 2,446 |
| <i>Cutibacterium acnes</i>          | 50 | 0 | 7 | 2,443 |
| <i>Proteus mirabilis</i>            | 48 | 2 | 0 | 2,450 |
| <i>Providencia stuartii</i>         | 50 | 0 | 0 | 2,450 |
| <i>Pseudomonas aeruginosa</i>       | 50 | 0 | 0 | 2,450 |
| <i>Pseudomonas fluorescens</i>      | 50 | 0 | 1 | 2,449 |
| <i>Salmonella enterica</i>          | 50 | 0 | 0 | 2,450 |
| <i>Serratia marcescens</i>          | 50 | 0 | 0 | 2,450 |
| <i>Staphylococcus aureus</i>        | 50 | 0 | 3 | 2,447 |
| <i>Staphylococcus caprae</i>        | 50 | 0 | 0 | 2,450 |
| <i>Staphylococcus epidermidis</i>   | 49 | 1 | 3 | 2,447 |
| <i>Staphylococcus haemolyticus</i>  | 50 | 0 | 0 | 2,450 |
| <i>Staphylococcus hominis</i>       | 49 | 1 | 2 | 2,448 |
| <i>Staphylococcus lugdunensis</i>   | 50 | 0 | 0 | 2,450 |
| <i>Stenotrophomonas maltophilia</i> | 50 | 0 | 0 | 2,450 |
| <i>Streptococcus agalactiae</i>     | 50 | 0 | 0 | 2,450 |
| <i>Streptococcus mitis</i>          | 49 | 1 | 0 | 2,450 |
| <i>Streptococcus pyogenes</i>       | 50 | 0 | 0 | 2,450 |
