# Supplementary material for: Performance of PCR/Electrospray Ionization-Mass Spectrometry on Whole Blood for Detection of Bloodstream Microorganisms in Patients with Suspected Sepsis
Source: PubMed Central journal article supplement (PMC7448645; doi:10.1128/jcm.01860-19), 2020-08-24
Supplement: JCM.01860-19-s0003.pdf [file JCM.01860-19-s0003.pdf]

**TABLE S3** Combined results of blood culture and PCR/ESI-MS on whole blood from 1,460 patients

| Organisms                             | Blood culture + |             | Blood culture - |             |
|---------------------------------------|-----------------|-------------|-----------------|-------------|
|                                       | PCR/ESI-MS+     | PCR/ESI-MS- | PCR/ESI-MS+     | PCR/ESI-MS- |
| <b>Gram-positive bacteria</b>         |                 |             |                 |             |
| <i>Staphylococcus aureus</i>          | 19              | 8           | 12              | 1,421       |
| <i>Enterococcus faecium</i>           | 6               | 0           | 17              | 1,437       |
| <i>Staphylococcus epidermidis</i>     | 5               | 15          | 3               | 1,437       |
| <i>Streptococcus mitis/pneumoniae</i> | 7               | 5           | 8               | 1,440       |
| <i>Cutibacterium acnes</i>            | 0               | 1           | 17              | 1,442       |
| <i>Nocardia</i> species               | 0               | 0           | 16              | 1,444       |
| <i>Streptococcus</i> species          | 3               | 8           | 4               | 1,445       |
| Coagulase-negative staphylococci      | 0               | 14          | 0               | 1,446       |
| <i>Enterococcus faecalis</i>          | 4               | 3           | 4               | 1,449       |
| <i>Micrococcus</i> species            | 0               | 1           | 6               | 1,453       |
| <i>Staphylococcus hominis</i>         | 0               | 6           | 1               | 1,453       |
| <i>Streptococcus pyogenes</i>         | 4               | 0           | 1               | 1,455       |
| <i>Staphylococcus capitis</i>         | 0               | 5           | 0               | 1,455       |
| <i>Streptococcus dysgalactiae</i>     | 1               | 0           | 1               | 1,458       |
| <i>Clostridium perfringens</i>        | 0               | 0           | 2               | 1,458       |
| <i>Clostridium septicum/tertium</i>   | 0               | 1           | 1               | 1,458       |
| <i>Gemella morbillorum</i>            | 0               | 1           | 1               | 1,458       |
| <i>Peptostreptococcus anaerobius</i>  | 0               | 2           | 0               | 1,458       |
| <i>Aerococcus urinae</i>              | 1               | 0           | 0               | 1,459       |
| <i>Aerococcus viridans</i>            | 0               | 0           | 1               | 1,459       |
| <i>Anaerococcus tetradius</i>         | 0               | 0           | 1               | 1,459       |
| <i>Bifidobacterium breve</i>          | 0               | 0           | 1               | 1,459       |
| <i>Bifidobacterium longum</i>         | 0               | 0           | 1               | 1,459       |
| <i>Clostridium botulinum</i>          | 0               | 0           | 1               | 1,459       |
| <i>Kocuria rhizophila</i>             | 0               | 0           | 1               | 1,459       |
| <i>Staphylococcus haemolyticus</i>    | 0               | 0           | 1               | 1,459       |
| <i>Streptococcus intermedius</i>      | 0               | 0           | 1               | 1,459       |
| <i>Streptococcus vestibularis</i>     | 0               | 0           | 1               | 1,459       |
| <i>Clostridium</i> species            | 0               | 1           | 0               | 1,459       |
| <i>Eggerthella lenta</i>              | 0               | 1           | 0               | 1,459       |
| <b>Gram-negative bacteria</b>         |                 |             |                 |             |
| <i>Escherichia coli</i>               | 50              | 4           | 79              | 1,327       |
| <i>Klebsiella pneumoniae</i>          | 20              | 5           | 24              | 1,411       |
| <i>Enterobacter cloacae</i> complex   | 4               | 1           | 14              | 1,441       |

|                                                |   |   |    |       |
|------------------------------------------------|---|---|----|-------|
| <i>Bacteroides fragilis/thetaiotaomicron</i>   | 1 | 1 | 10 | 1,448 |
| <i>Pseudomonas aeruginosa</i>                  | 5 | 0 | 4  | 1,451 |
| <i>Serratia marcescens</i>                     | 5 | 3 | 1  | 1,451 |
| <i>Haemophilus influenzae</i>                  | 0 | 2 | 5  | 1,453 |
| <i>Klebsiella oxytoca</i>                      | 4 | 0 | 2  | 1,454 |
| <i>Citrobacter freundii</i>                    | 0 | 0 | 6  | 1,454 |
| <i>Fusobacterium nucleatum</i>                 | 0 | 0 | 6  | 1,454 |
| <i>Proteus mirabilis</i>                       | 1 | 1 | 2  | 1,456 |
| <i>Stenotrophomonas maltophilia</i>            | 1 | 0 | 2  | 1,457 |
| <i>Morganella morganii</i>                     | 1 | 2 | 0  | 1,457 |
| <i>Bacteroides caccae</i>                      | 0 | 0 | 3  | 1,457 |
| <i>Fusobacterium necrophorum</i>               | 1 | 0 | 1  | 1,458 |
| <i>Aggregatibacter segnis</i>                  | 0 | 0 | 2  | 1,458 |
| <i>Bacteroides uniformis</i>                   | 0 | 0 | 2  | 1,458 |
| <i>Bacteroides vulgatus</i>                    | 0 | 0 | 2  | 1,458 |
| <i>Enterobacter aerogenes</i>                  | 0 | 0 | 2  | 1,458 |
| <i>Haemophilus parasuis</i>                    | 0 | 0 | 2  | 1,458 |
| <i>Odoribacter splanchnicus</i>                | 0 | 0 | 2  | 1,458 |
| <i>Shigella boydii</i>                         | 0 | 0 | 2  | 1,458 |
| <i>Acinetobacter baumannii</i>                 | 0 | 1 | 1  | 1,458 |
| <i>Citrobacter braakii</i>                     | 1 | 0 | 0  | 1,459 |
| <i>Acinetobacter lwoffii</i>                   | 0 | 0 | 1  | 1,459 |
| <i>Aeromonas eucrenophila</i>                  | 0 | 0 | 1  | 1,459 |
| <i>Aeromonas hydrophila</i>                    | 0 | 0 | 1  | 1,459 |
| <i>Aeromonas jandaei/veronii</i>               | 0 | 0 | 1  | 1,459 |
| <i>Aeromonas salmonicida</i>                   | 0 | 0 | 1  | 1,459 |
| <i>Bacteroides ovatus</i>                      | 0 | 0 | 1  | 1,459 |
| <i>Bordetella avium</i>                        | 0 | 0 | 1  | 1,459 |
| <i>Bordetella bronchiseptica/parapertussis</i> | 0 | 0 | 1  | 1,459 |
| <i>Bordetella petrii</i>                       | 0 | 0 | 1  | 1,459 |
| <i>Citrobacter youngae</i>                     | 0 | 0 | 1  | 1,459 |
| <i>Enterobacter cowanii</i>                    | 0 | 0 | 1  | 1,459 |
| <i>Escherichia vulneris</i>                    | 0 | 0 | 1  | 1,459 |
| <i>Ewingella americana/Pantoea agglomerans</i> | 0 | 0 | 1  | 1,459 |
| <i>Haemophilus parainfluenzae</i>              | 0 | 0 | 1  | 1,459 |
| <i>Legionella pneumophila</i>                  | 0 | 0 | 1  | 1,459 |
| <i>Neisseria gonorrhoeae</i>                   | 0 | 0 | 1  | 1,459 |
| <i>Neisseria meningitidis</i>                  | 0 | 0 | 1  | 1,459 |
| <i>Ochrobactrum anthropi</i>                   | 0 | 0 | 1  | 1,459 |

|                                       |            |           |            |       |
|---------------------------------------|------------|-----------|------------|-------|
| <i>Prevotella denticola</i>           | 0          | 0         | 1          | 1,459 |
| <i>Salmonella enterica</i>            | 0          | 0         | 1          | 1,459 |
| <i>Tatumella ptyseos</i>              | 0          | 0         | 1          | 1,459 |
| <i>Bacteroides</i> species            | 0          | 1         | 0          | 1,459 |
| <i>Moraxella</i> species              | 0          | 1         | 0          | 1,459 |
| <i>Oligella ureolytica/urethralis</i> | 0          | 1         | 0          | 1,459 |
| <i>Pasteurella multocida</i>          | 0          | 1         | 0          | 1,459 |
| <i>Proteus vulgaris</i>               | 0          | 1         | 0          | 1,459 |
| <i>Salmonella</i> species             | 0          | 1         | 0          | 1,459 |
| <b>Mycobacteria</b>                   |            |           |            |       |
| <i>Mycobacterium</i> species          | 0          | 0         | 5          | 1,455 |
| <b>Candida species</b>                |            |           |            |       |
| <i>Candida albicans</i>               | 2          | 1         | 9          | 1,448 |
| <i>Candida glabrata</i>               | 0          | 0         | 6          | 1,454 |
| <i>Candida</i> species                | 1          | 0         | 1          | 1,458 |
| <i>Candida parapsilosis</i>           | 1          | 0         | 1          | 1,458 |
| <i>Candida tropicalis</i>             | 1          | 0         | 1          | 1,458 |
| <i>Candida dubliniensis</i>           | 0          | 0         | 2          | 1,458 |
| <i>Candida famata</i>                 | 0          | 0         | 1          | 1,459 |
| <b>Total positives</b>                | <b>149</b> | <b>99</b> | <b>324</b> |       |
